# Supplementary material for: Accounting for assay performance when estimating the temporal dynamics in SARS-CoV-2 seroprevalence in the U.S
Source: PubMed Central journal article supplement (PMC10115837; doi:10.1038/s41467-023-37944-5), 2023-04-19
Supplement: 41467_2023_37944_MOESM1_ESM.pdf [file 41467_2023_37944_MOESM1_ESM.pdf]

1 *Supplementary Information for Accounting for assay performance when estimating*  
2 *the temporal dynamics in SARS-CoV-2 seroprevalence in the U.S.*

3 Bernardo García-Carreras, Matt D. T. Hitchings, Michael A. Johansson, Matthew Biggerstaff, Rachel B. Slayton,  
4 Jessica M. Healy, Justin Lessler, Talia Quandelacy, Henrik Salje, Angkana T. Huang, Derek A. T. Cummings

5 **LABORATORY METHODS**

6 Laboratory A used the Roche Elecsys Anti-SARS-CoV-2 pan-immunoglobulin immunoassay that targets the nucle-  
7 ocapsid protein and has a sensitivity of 100% (95% confidence intervals (CI), 88.3%–100.0%) and specificity of 99.8%  
8 (95% CI, 99.7%–99.9%). Specimens were considered reactive at a cutoff index of 1.0 or greater without serum dilution  
9 [1, 2]. Laboratory B performed testing using the Abbott ARCHITECT SARS-CoV-2 IgG immunoassay targeting the  
10 nucleocapsid protein or Ortho-Clinical Diagnostics VITROS SARS-CoV-2 IgG immunoassay targeting the spike pro-  
11 tein. Specimens tested by ARCHITECT were considered reactive at a cutoff index of 1.4 or greater, whereas specimens  
12 tested by VITROS were considered reactive at a cutoff index of 1.0 or greater. Using these definitions of reactivity,  
13 ARCHITECT had a sensitivity of 100.0% (95% CI, 95.8%–100.0%) and specificity 99.6% (95% CI, 99.0%–99.9%);  
14 VITROS had a sensitivity of 90.0% (95% CI, 76.9%–96.0%) and specificity of 100.0% (95% CI, 99.1%–100.0%; 1, 2).  
15 For all assays, sensitivity was determined in symptomatic persons with real-time reverse transcriptase polymerase  
16 chain reaction–confirmed SARS-CoV-2 infection. The Roche assay was used through all survey rounds, the Abbott  
17 assay was used until July 2021 (round 24), and the Ortho assay was used until January 2021 (round 13). All assays  
18 were granted Emergency Use Authorization by the U.S. Food and Drug Administration and used according to the  
19 Instructions for Use provided by the manufacturers [1–3].

## ADDITIONAL RESULTS

SUPPLEMENTARY TABLE I. Regression coefficients and standard errors of the logistic regressions for the reference model and best waning model (chosen by LOO RMSE; Table 1 and Fig. 2 in the main text), in which the percentage of the population reported as a case (“Sqrt % cases”) has been adjusted assuming 19, 10, and 91 weeks to seroreversion for Abbott, Ortho, and Roche assays, respectively, and a  $-1$  week lag between seroreversion and a case being reported.

|                           | Reference model    | Best waning model           |
|---------------------------|--------------------|-----------------------------|
| Sqrt % cases              | 0.922*** (0.076)   | 0.380*** (0.026)            |
| Sqrt % deaths             | 0.361 (0.620)      | 3.142*** (0.443)            |
| % excess deaths           | -0.115 (0.729)     | 1.975*** (0.682)            |
| Sqrt % cases hospitalized | -0.026 (0.060)     | -0.294*** (0.080)           |
| Ln % tested (PCR)         | -0.099 (0.089)     | 0.519*** (0.088)            |
| % vaccinated              | -0.002* (0.001)    | 0.001 (0.001)               |
| % Abbott Architect        | -0.006*** (0.0005) | -0.005*** (0.0005)          |
| % Roche Elecsys           | 0.003*** (0.0005)  | 0.001 (0.001)               |
| % cases 0–19 years        | -0.024 (0.017)     | -0.003 (0.021)              |
| % cases 20–49 years       | 0.002 (0.011)      | -0.008** (0.011)            |
| % cases 50–69 years       | 0.020 (0.026)      | 0.034 (0.030)               |
| RMSE                      | 0.02211            | 0.02095                     |
| LOO median RMSE           | 0.02267            | 0.02046                     |
| Observations              | 1398               | 1398                        |
| Log likelihood            | -7, 198            | -7, 158                     |
| $\Delta$ AIC              | 80                 | 0                           |
| <i>Note:</i>              |                    | *p<0.1; **p<0.05; ***p<0.01 |

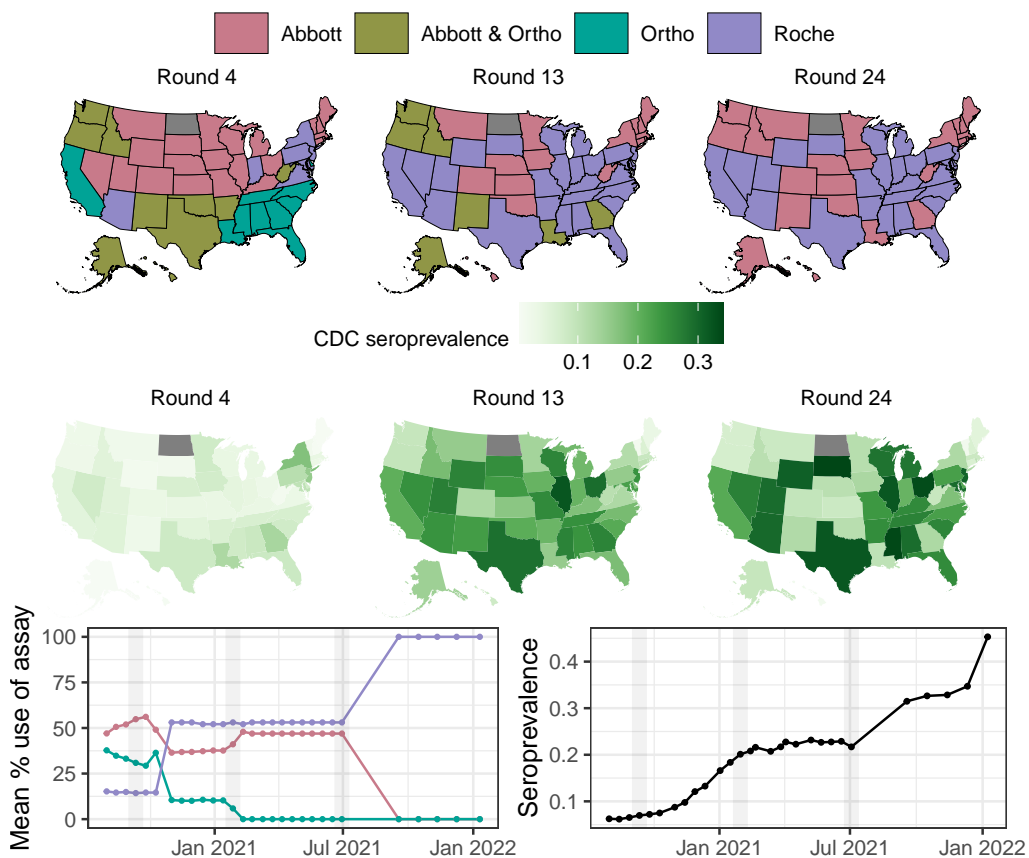

SUPPLEMENTARY FIG. 1. Spatial distribution of assays used in each state and seroprevalence, at three points in time, September 2020 (round 4), January 2021 (round 13), and July 2021 (round 24). Mean percentage use of each of the assays across states over time, and country-wide seroprevalence over time. The vertical gray bands in the time series indicate the three time points for the maps. Note that the distribution of assay use shown for July 2021 (round 24) remained the same between February and July 2021 (rounds 15 to round 24). After July 2021, all states used Roche assays exclusively (see Supplementary Fig. 3).

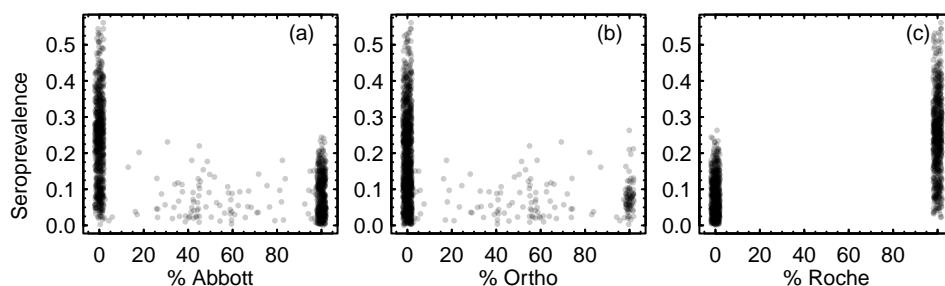

SUPPLEMENTARY FIG. 2. Seroprevalence from the CDC serosurveys as a function of the percentage of each assay used for each serosurvey, for (a) Abbott, (b) Ortho, and (c) Roche assays. Points that were equal to 0% or 100% on the x-axes have been jittered for greater clarity. Note that Ortho assays were only used until January 2021 (the first 13 rounds of the serosurveys).

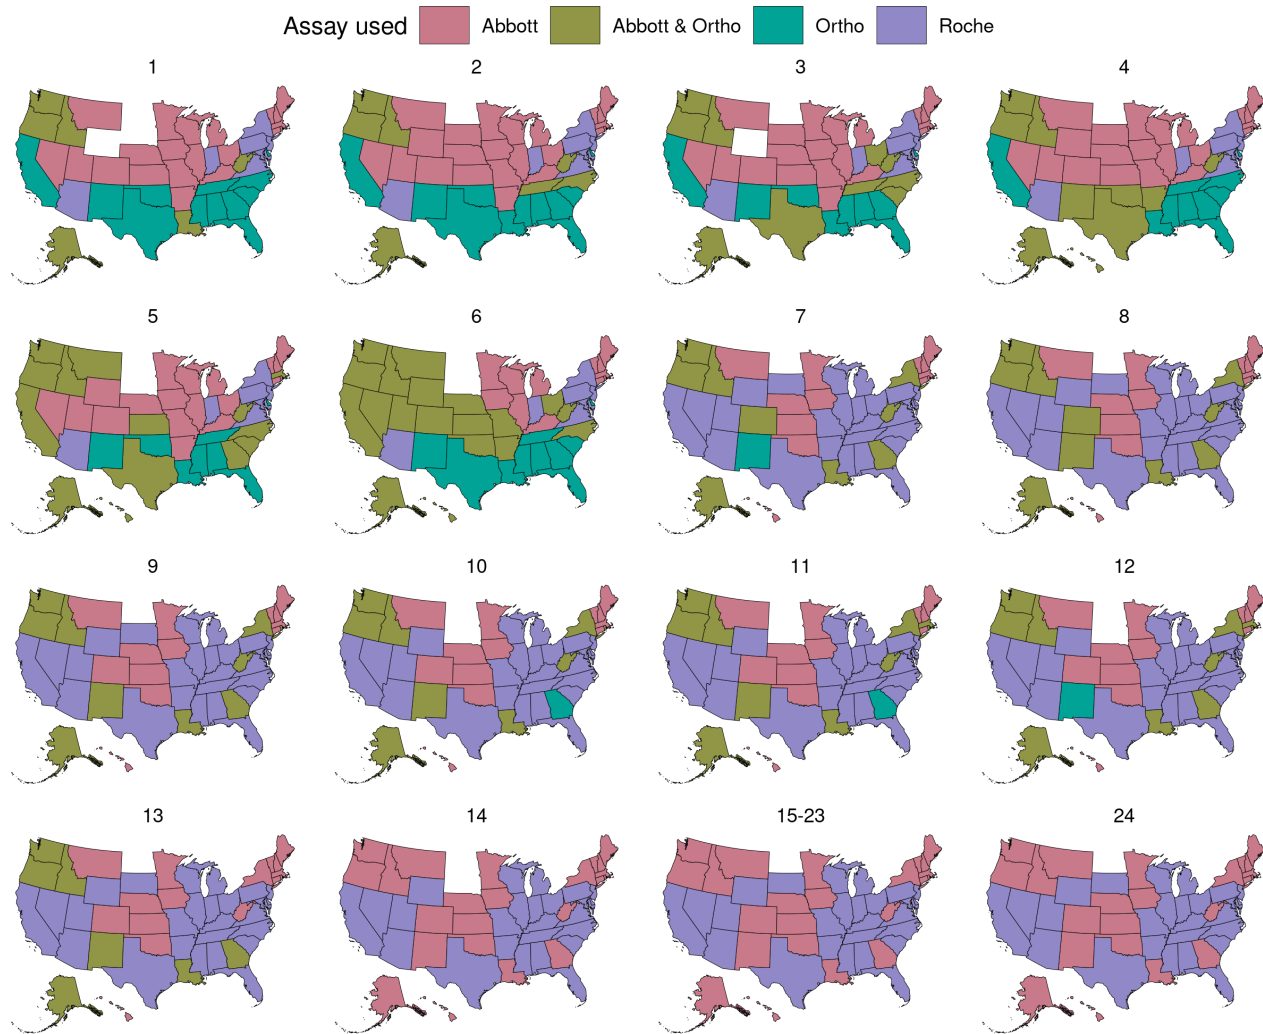

SUPPLEMENTARY FIG. 3. Assays used in each state, per round. After July 2021 (round 24), serosurveys in all states were performed only using Roche Elecsys assays.

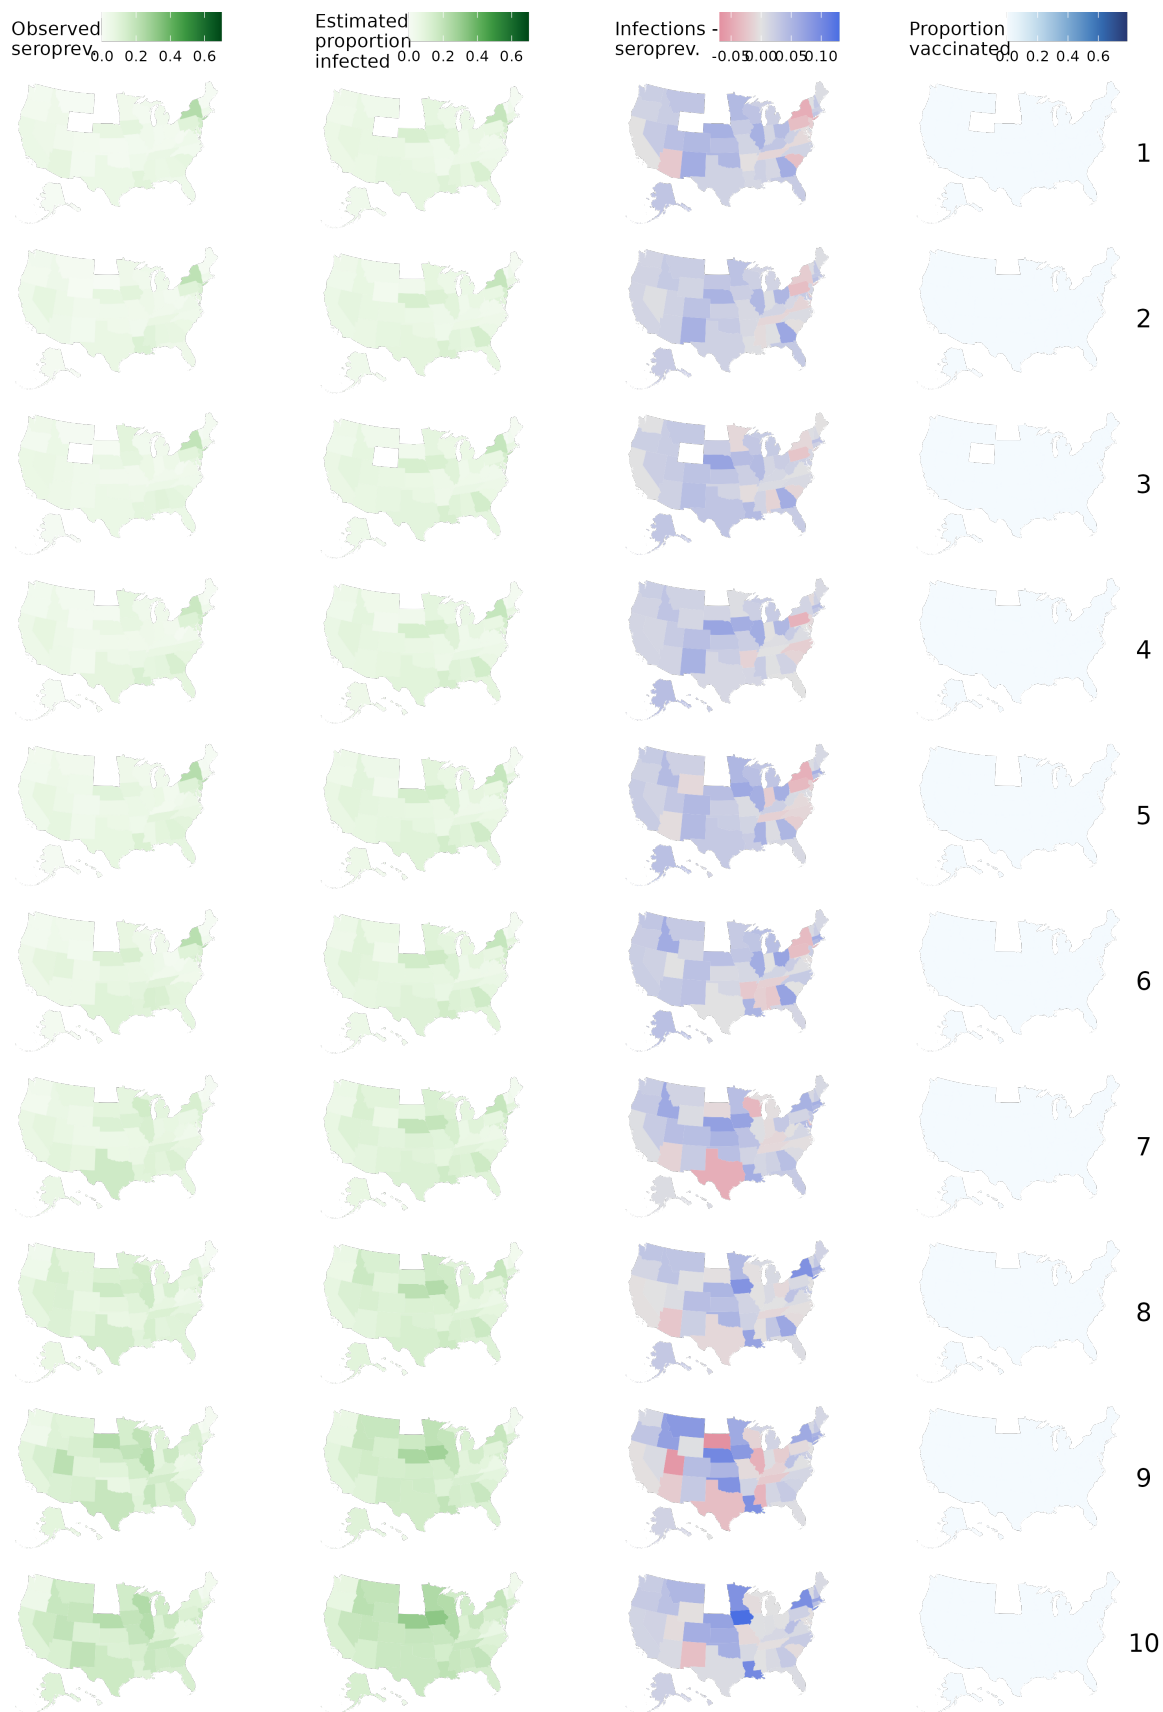

SUPPLEMENTARY FIG. 4. Observed seroprevalence, estimated proportion infected using the best waning model as per LOO median RMSE (Table 1 in the main text), the difference between estimated proportion infected and observed seroprevalence, and the proportion of the population vaccinated, between July 2020 and December 2020 (rounds 1–10 of the serosurveys).

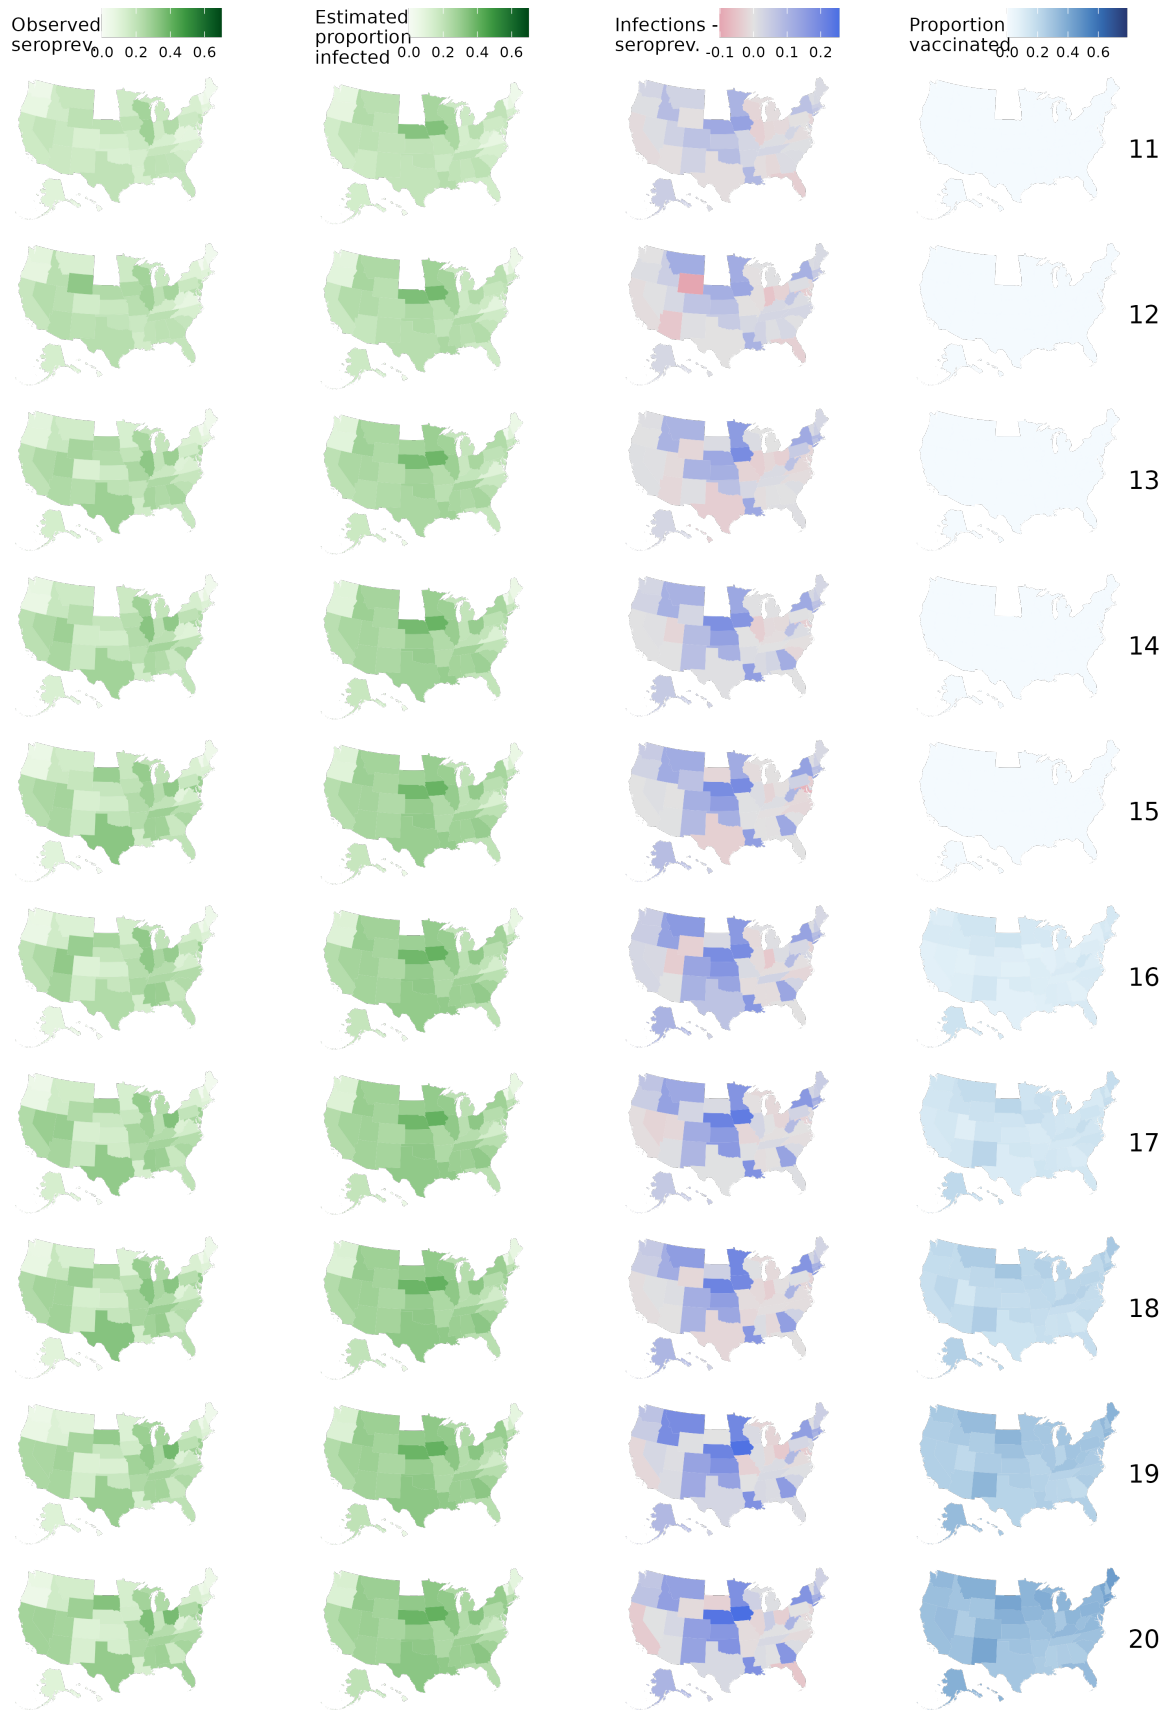

SUPPLEMENTARY FIG. 5. Observed seroprevalence, estimated proportion infected using the best waning model as per LOO median RMSE (Table 1 in the main text), the difference between estimated proportion infected and observed seroprevalence, and the proportion of the population vaccinated, between December 2020 and May 2021 (rounds 11–20 of the serosurveys).

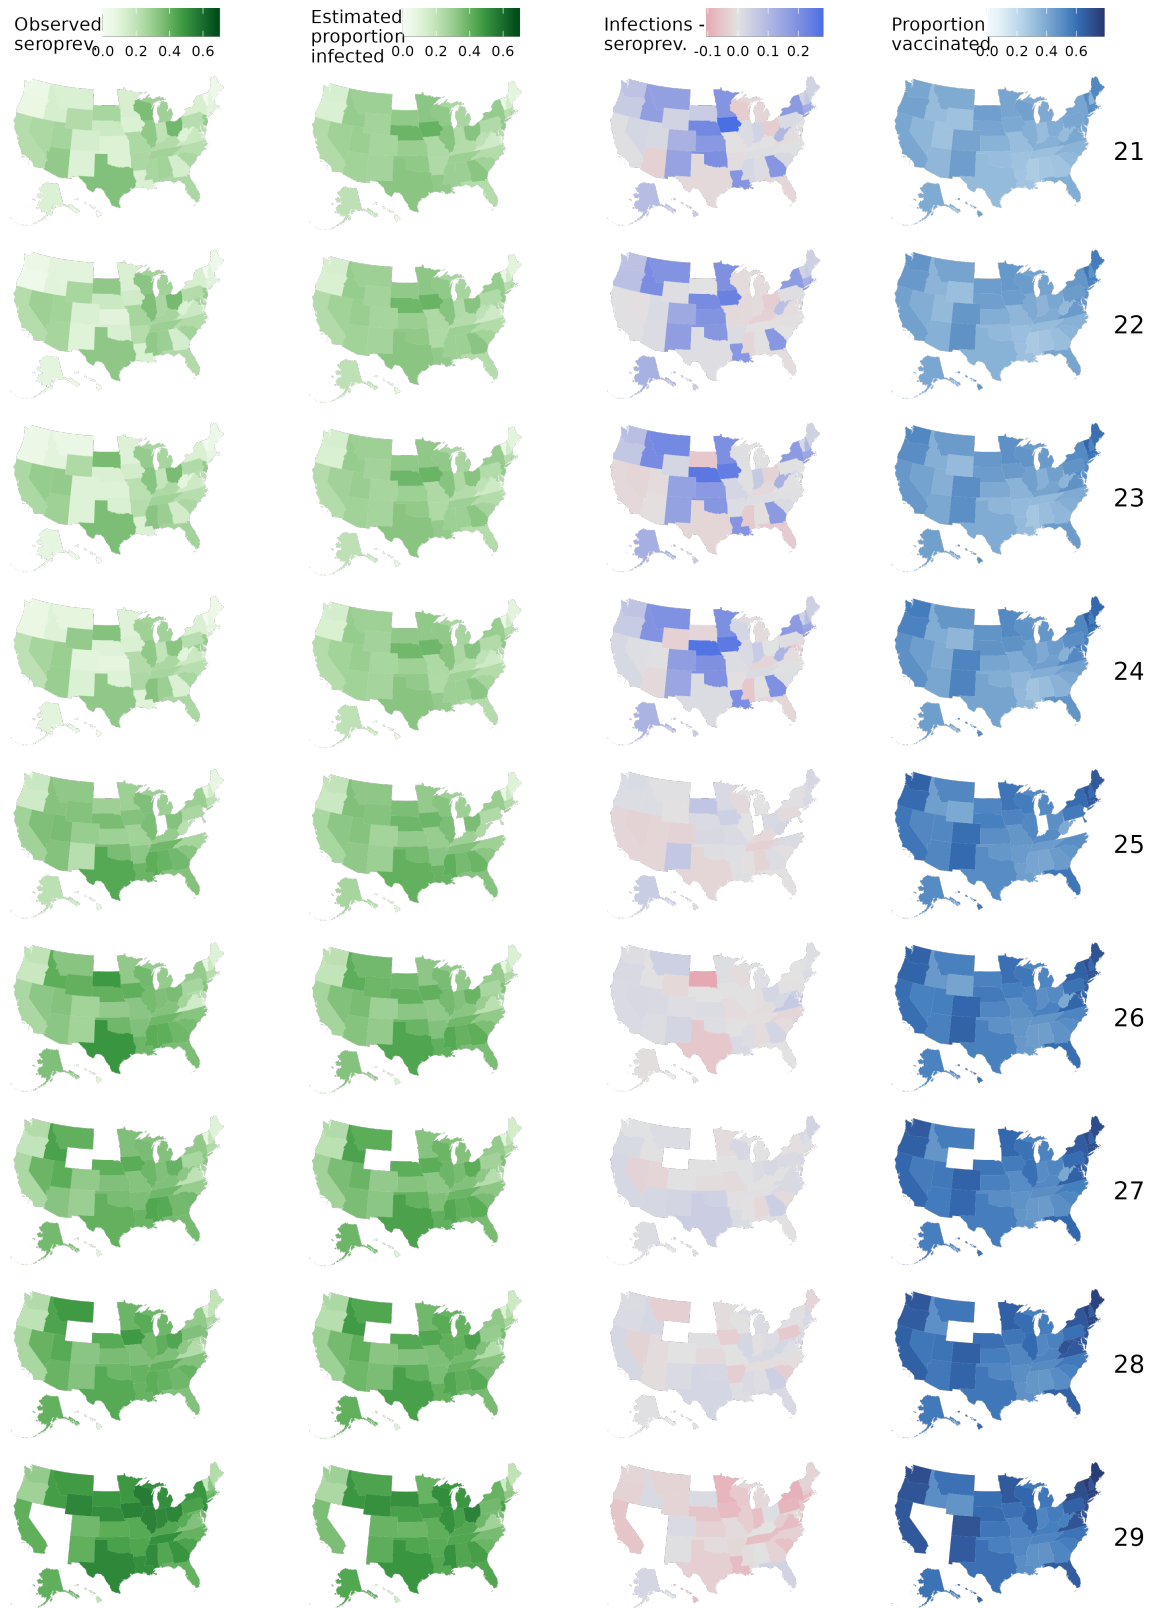

SUPPLEMENTARY FIG. 6. Observed seroprevalence, estimated proportion infected using the best waning model as per LOO median RMSE (Table 1 in the main text), the difference between estimated proportion infected and observed seroprevalence, and the proportion of the population vaccinated, between May 2021 and January 2022 (rounds 21–29 of the serosurveys).

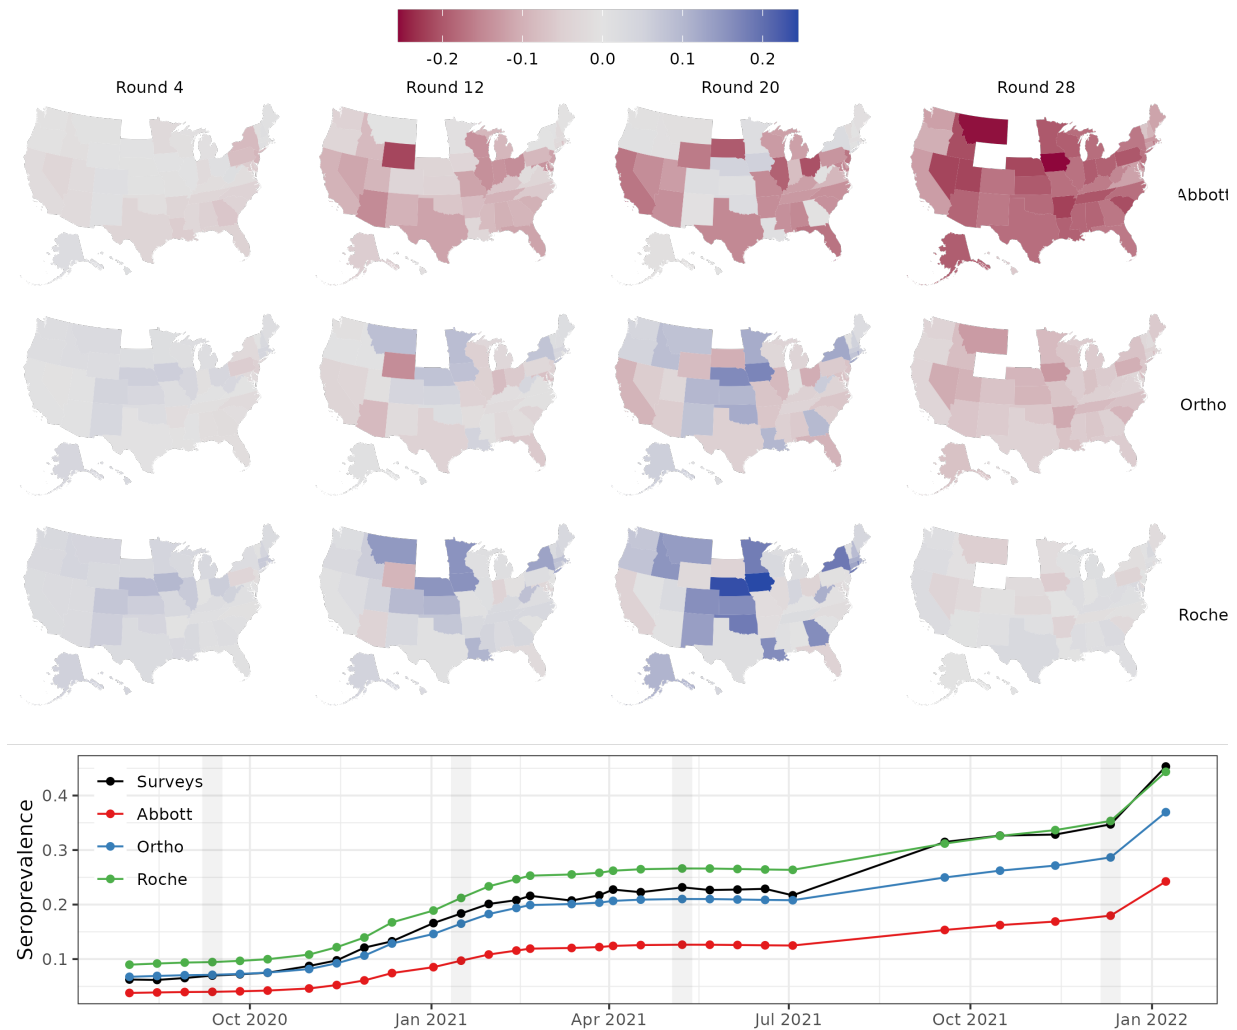

SUPPLEMENTARY FIG. 7. The differences in estimated seroprevalence were all states to have used the same assay, as estimated using the reference model. For the maps, assays are arranged in rows, and columns show four snapshots (survey rounds) in time. For example, in the top row, reds indicate the extent to which the seroprevalence would have been lower, had all states used Abbott assays only. Gray values mean that seroprevalence estimates would have changed little, because those states likely were already using those assays for those rounds. In the middle and bottom rows, blues show the extent to which seroprevalence would have been higher, had the Ortho or Roche assay, respectively, been used exclusively. The time series in the bottom panel show the average seroprevalence across all states as observed in the surveys, and had all states exclusively used one of the assays. The four vertical gray lines approximately indicate the timing of the four snapshots in time of the maps above.



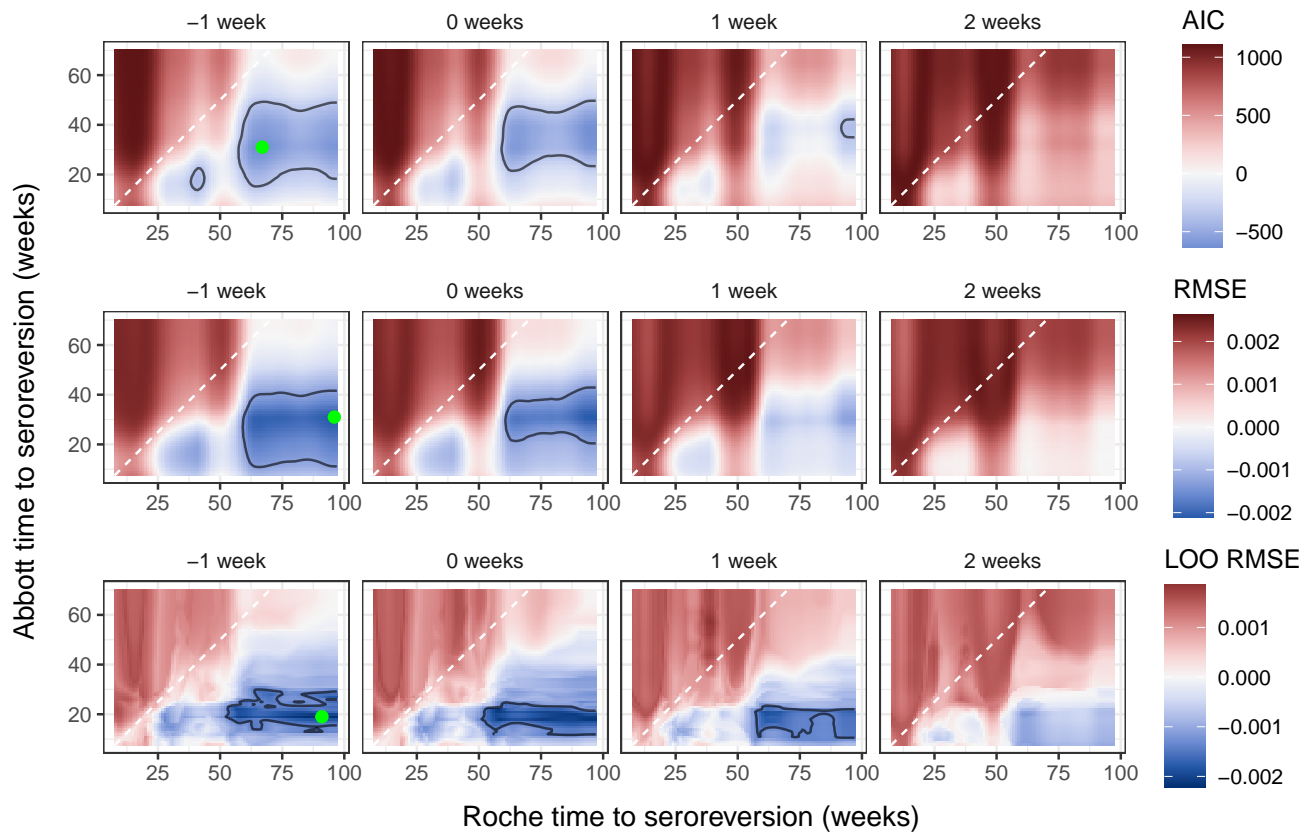

SUPPLEMENTARY FIG. 8. Model metrics for waning models compared to the (non-waning) reference model. Each row of panels is a different model metric (AIC, RMSE, leave-one-out median RMSE), and each column of panels refers to a different detection lead or lag. Within each tile plot, each pixel corresponds to a single model, where cases have been adjusted assuming three different times to seroreversion, one for each assay. Metrics are expressed relative to the metric for the reference model (that does not account for waning); blues (respectively reds) indicate waning models that are better (respectively worse), per that metric, relative to the model without waning. Tile plots here show results for the subset for which the time to seroreversion for Ortho was at least 49 weeks (for AIC and RMSE) and 10 weeks (for LOO median RMSE). Green points indicate the best model by each metric, and contour lines enclose the best five percentile models as per each metric. Also see Table 1 in the main text.

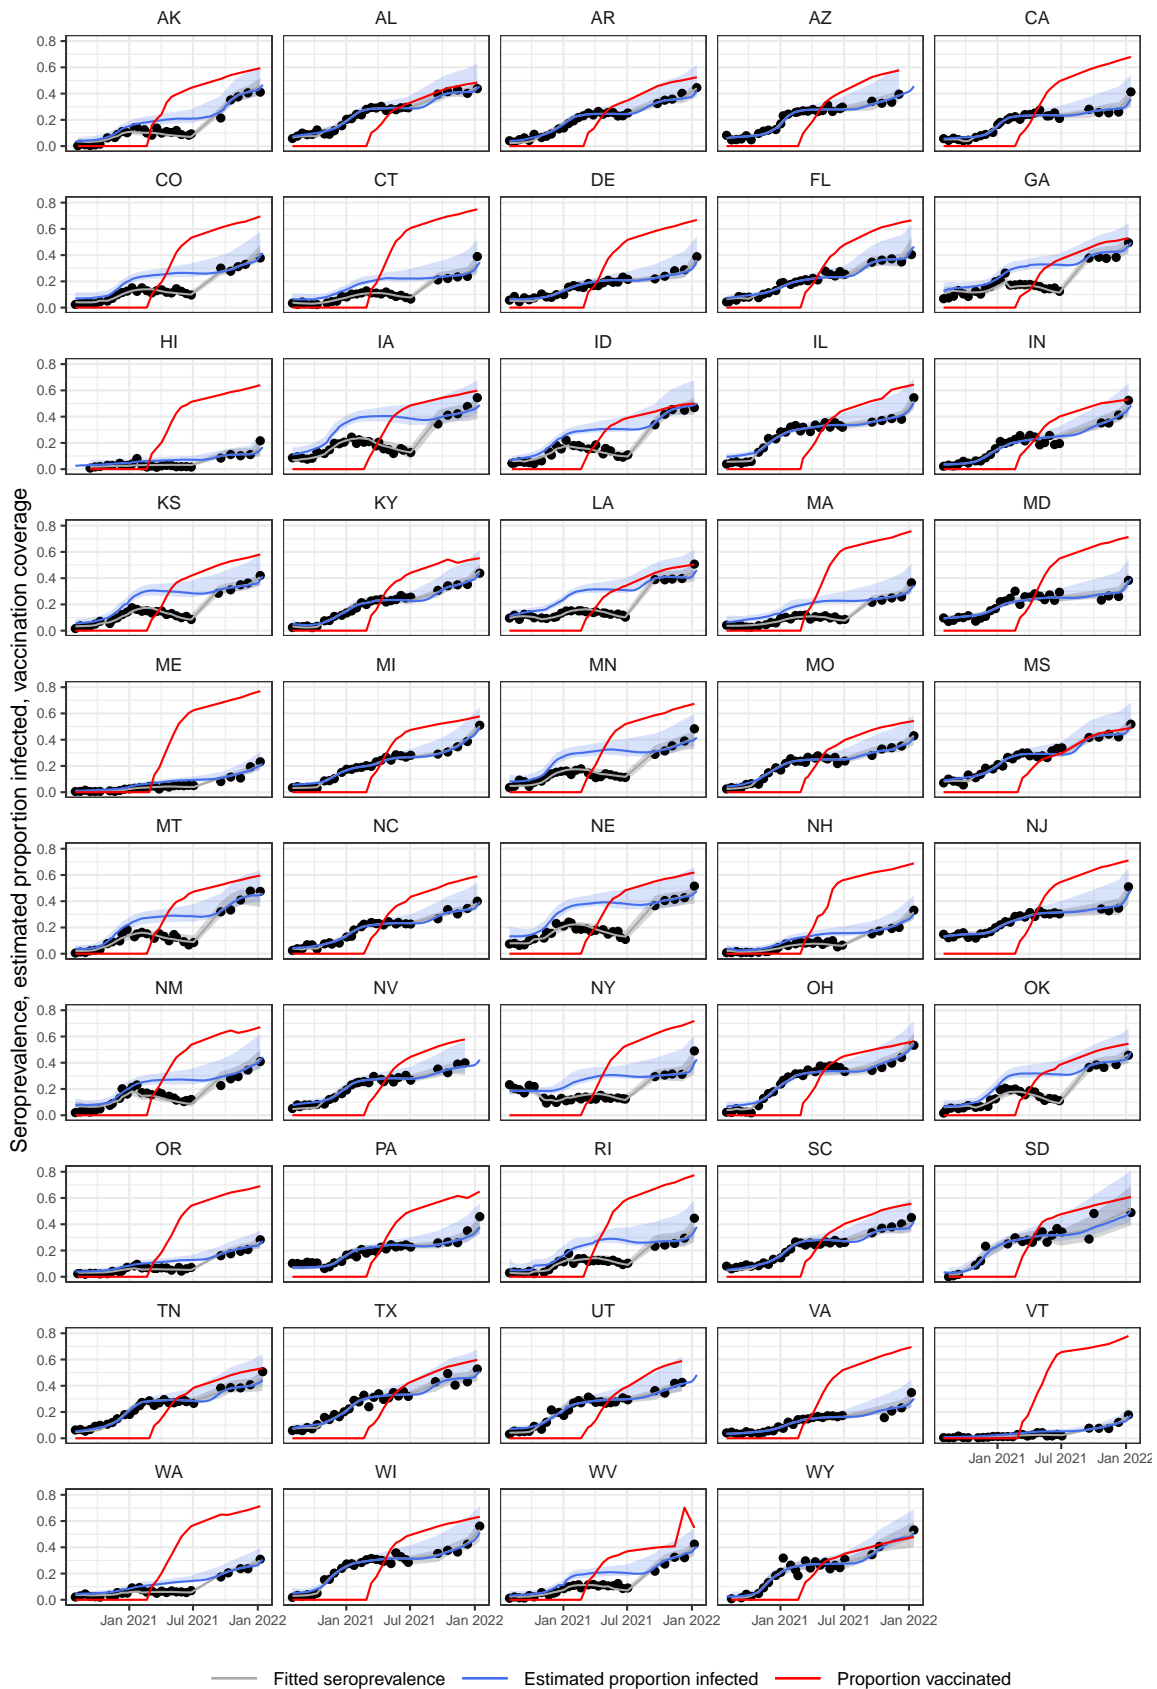

SUPPLEMENTARY FIG. 9. Serosurveys, fitted seroprevalence, estimated proportion infected from the best waning model (see Fig. 2 and Table 1 in the main text), and vaccination coverage over time for each of the states included in the model. Confidence envelopes around fits and estimated proportions infected include model uncertainty and uncertainty around the selection of times to seroreversion and lead/lag between seroprevalence and reported cases (see Methods in the main text for a description of how uncertainty is estimated).

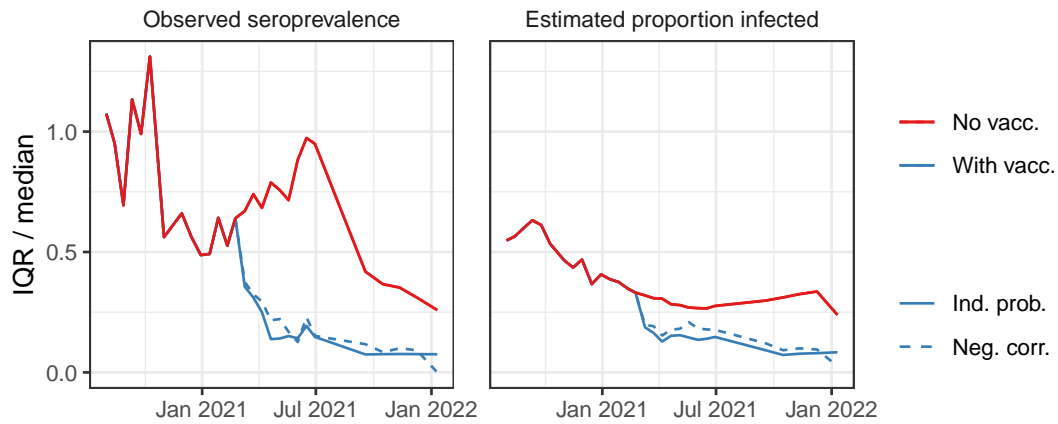

SUPPLEMENTARY FIG. 10. The robust coefficient of variation (interquartile range (IQR) divided by the median) in observed seroprevalence and estimated proportion infected, over time, across states. Solid blue lines assume the probabilities of being infected or vaccinated to be independent, while dashed lines assume a perfect negative correlation. The proportion infected were estimated using the best waning model (Table 1 in the main text). Smaller values of the robust coefficient of variation point to greater homogeneity across the U.S. Accounting for vaccinations (blue lines), and the assays used and their different waning rates (right panel) both lead to greater homogeneity across states in seroprevalence and estimates of the proportion infected.

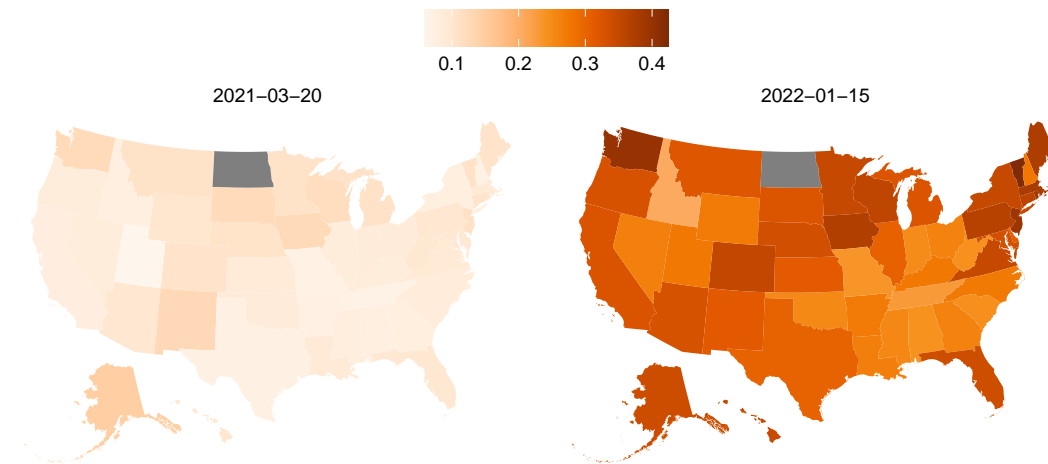

SUPPLEMENTARY FIG. 11. Pre-infection vaccination coverage at two different time points. The proportion of individuals that may have received a complete series of a vaccine prior to being infected, assuming that vaccinations were distributed independently of prior infection status (see Methods in the main text).

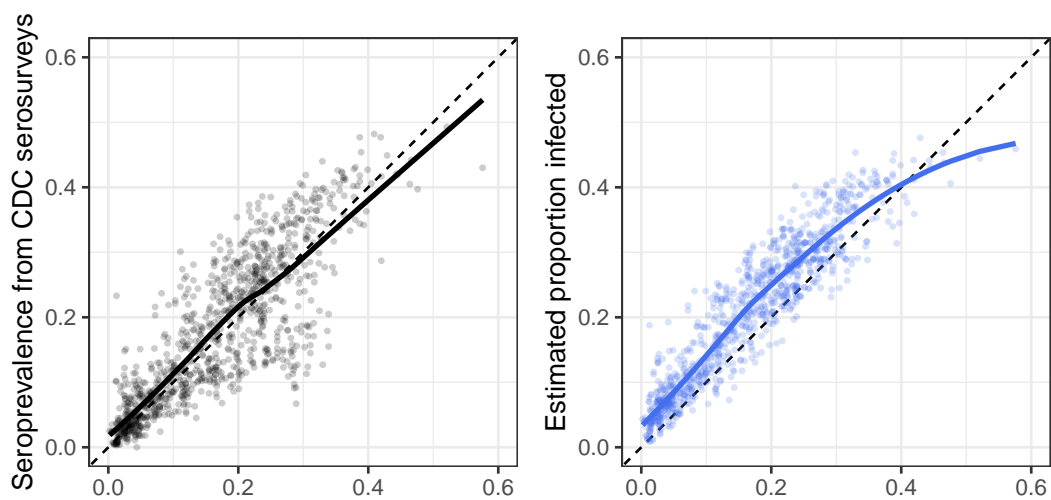

Seroprevalence (no vaccinations) from the blood donors dataset

SUPPLEMENTARY FIG. 12. Comparison of estimated proportion infected (without vaccinations) from the blood donors dataset, and both the estimates from the serosurveys (black line and points) and estimated proportion infected (blue line and points) from the logistic regression. Lines are LOESS fits to the underlying data.

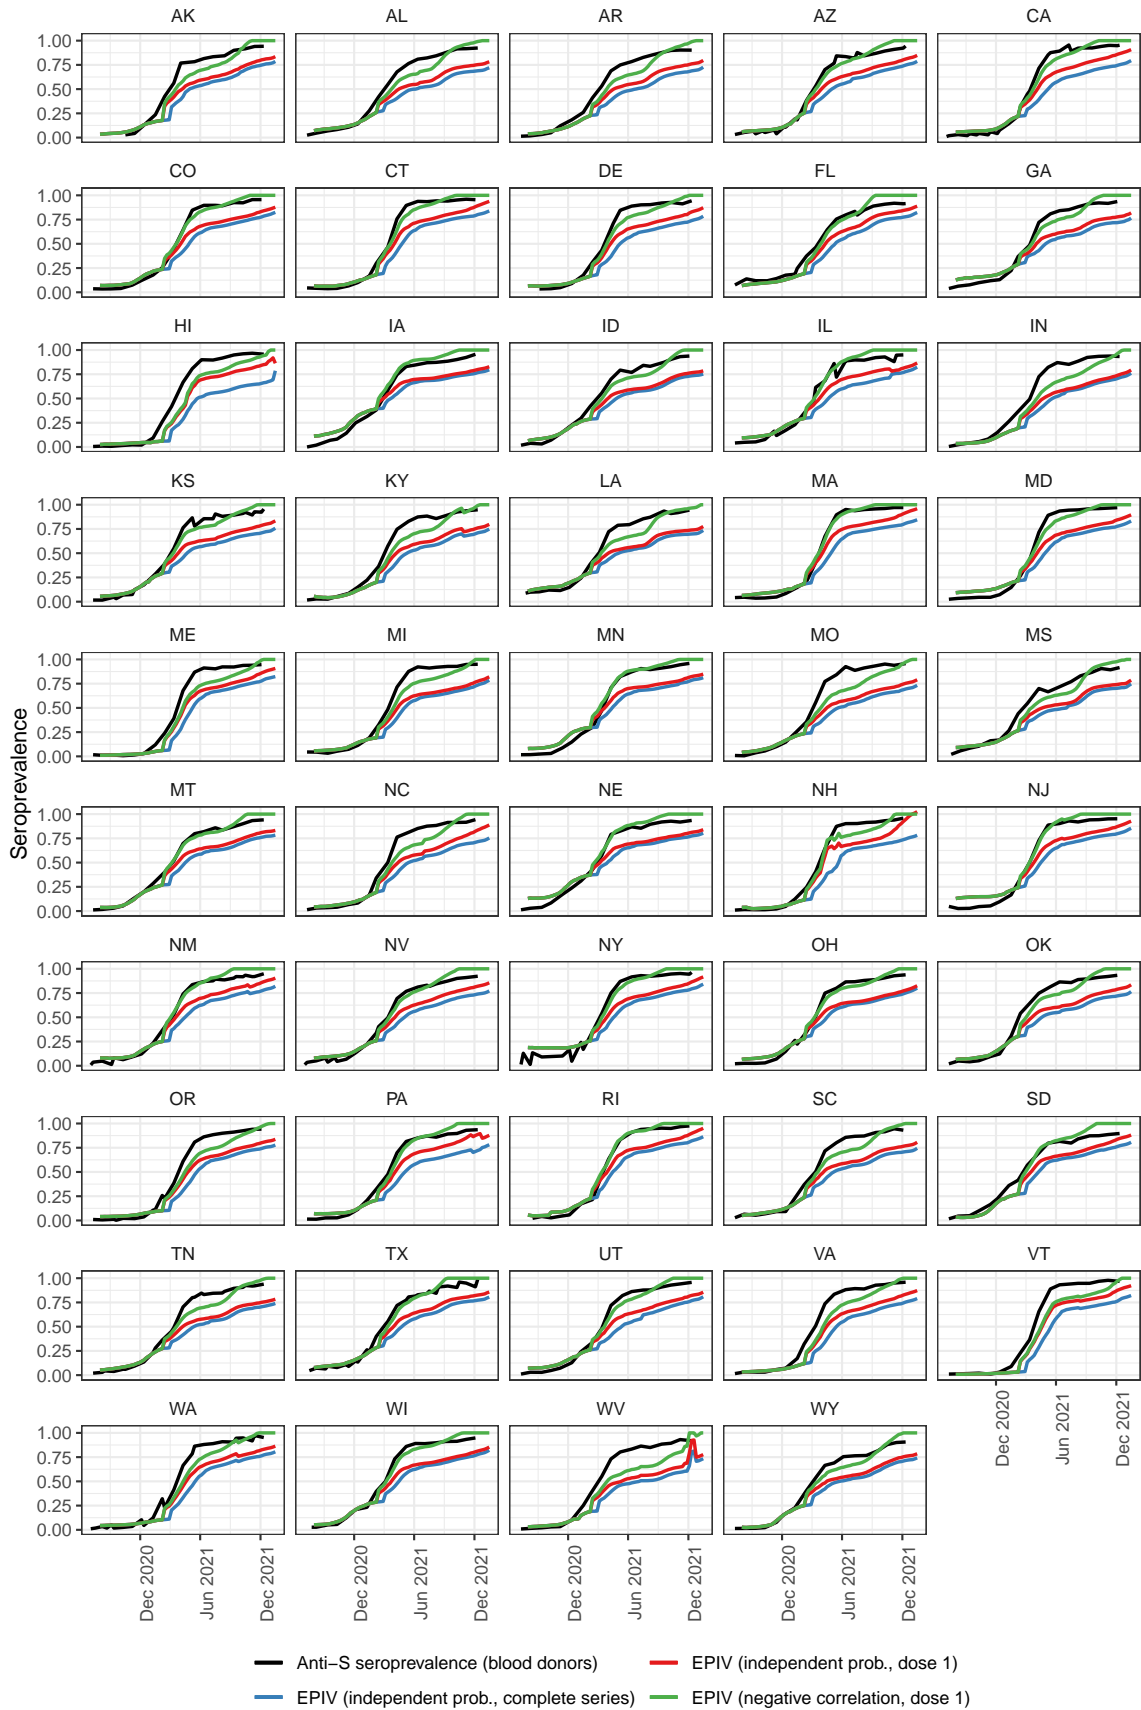

SUPPLEMENTARY FIG. 13. Time series of anti-S seroprevalence from the blood donors dataset, compared to estimated proportions infected and/or vaccinated using the best waning model (Table 1 in the main text).

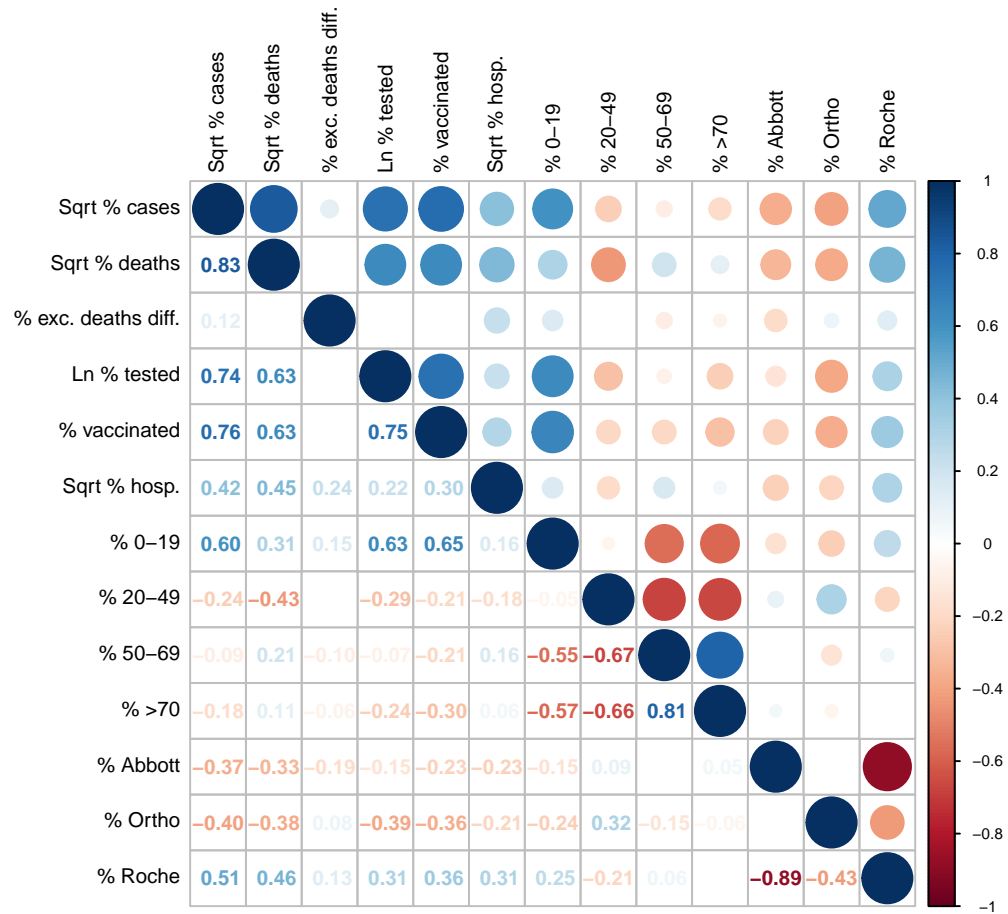

SUPPLEMENTARY FIG. 14. Spearman cross-correlations between variables used in the models. Note that “% > 70” and “% Ortho” were excluded from the models. Darker blues and reds indicate larger positive and negative correlations between pairs of variables, respectively. Blank squares indicate non-significant correlations between the corresponding pairs of variables.

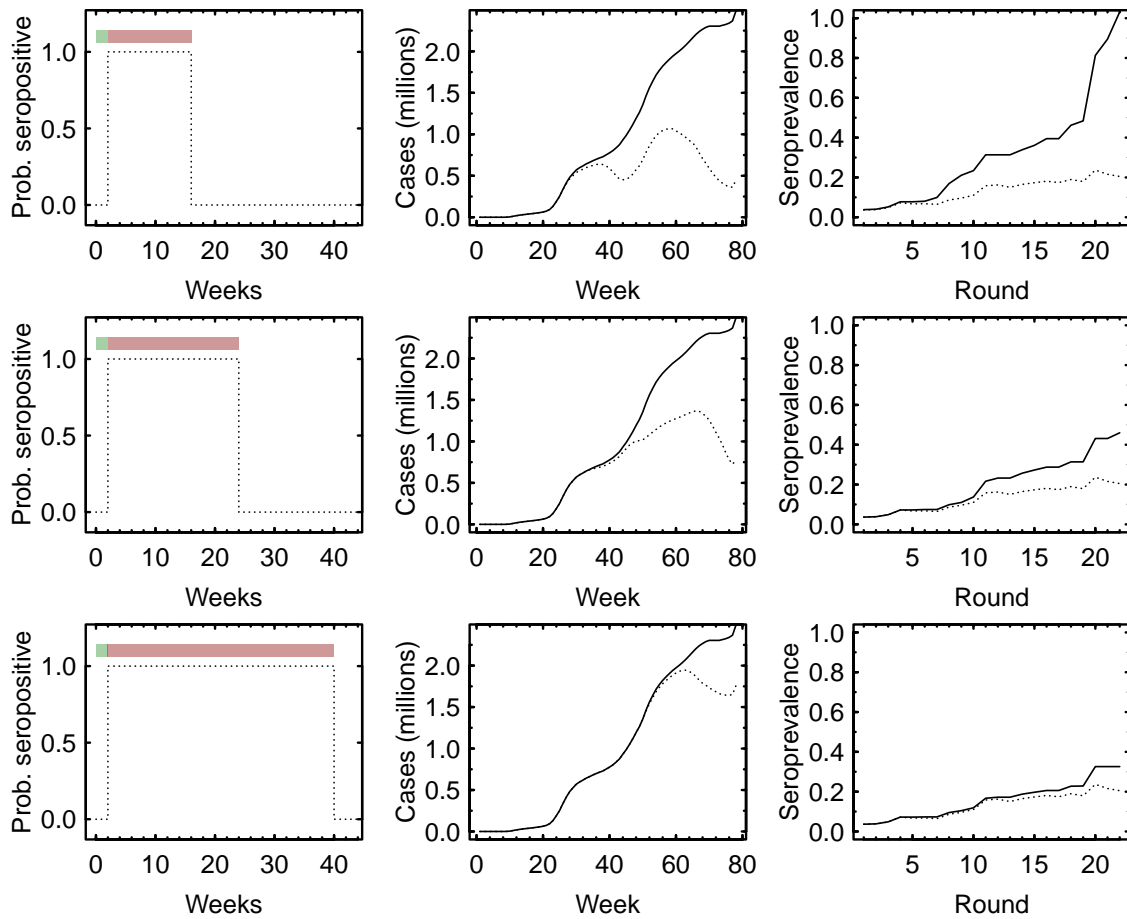

SUPPLEMENTARY FIG. 15. Rationale for adjusting cases. Each reported case is multiplied by a probability of testing seropositive (left column of panels), which takes the form of a step function, with a lead or lag in time between seroconversion and a case being reported (green bars), and a limited amount of time during which a case remains seropositive (red bars) before seroreverting. Using these step functions, cumulative cases can be adjusted to account for waning (middle panels). Here, solid lines are the cumulative cases, and the dashed lines are the cases adjusted for waning using the step functions in the left panels. The different step functions would imply different degrees to which serosurveys are an underestimate of the proportion infected (right panels). Here, solid lines are what the hypothetical proportion infected might have been, given the waning rates encoded in the step functions of the left column, and the dashed lines are the estimated seroprevalence (that include the effects of waning in antibodies). The top, middle, and bottom rows assume waning rates that go from faster to slower, so with faster waning rates (shorter times to seroreversion; top row), agreement between seroprevalence and the proportion infected is worse than if waning rates were slower (bottom row).

## ACCOUNTING FOR NON-LINEAR RELATIONSHIPS

21

22 Acknowledging that the relationship between seroprevalence and some of the covariates may also be nonlinear, we fit  
23 the same logistic regression model described in the main text, but allowing for non-parametric non-linear relationships  
24 between variables and seroprevalence. We used natural cubic splines (function 'ns' in package 'splines' v4.2.2, with  
25 five degrees of freedom) within function 'svyglm' in package 'survey'. The same weights (the inverse of the sampling  
26 proportions) were used here. In these models, the interaction between week and state, the percentage of Roche and  
27 Abbott tests, and the cumulative proportion of the population vaccinated were kept as linear terms. Allowing the  
28 interaction between week and state to be smooth (and thus allowing the seroprevalence in each state to be described  
29 by a smooth function of time) did lead to models with better fits across all metrics. However, conferring such a degree  
30 of flexibility to the model would have meant that some of the signal due to waning that might otherwise have been  
31 captured through our adjusted cases would instead have been picked up in this interaction term.

32 Results show that predicted seroprevalences from both logistic regressions (without and with splines) were very  
33 highly correlated (Supplementary Fig. 16).

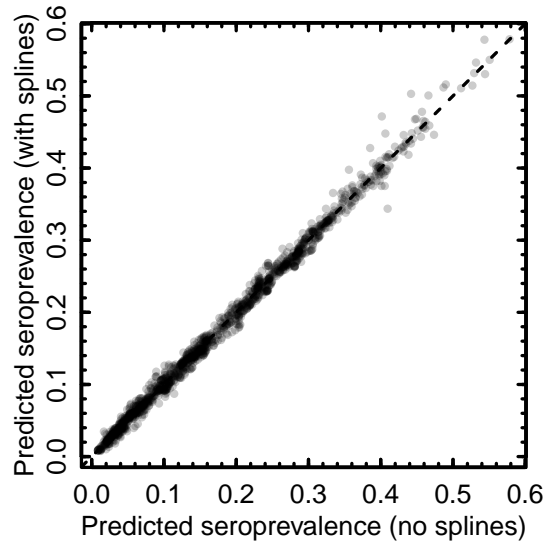

SUPPLEMENTARY FIG. 16. Comparison of predicted seroprevalences using the reference model made by the logistic regression without splines (used in the main text) and the logistic regression with splines. The Pearson correlation coefficient is 0.997.



- 
- 34 [1] US Food & Drug Administration, Individual EUAs for serology tests for SARS-CoV-2, [https://www.fda.gov/medical-](https://www.fda.gov/medical-devices/coronavirus-disease-2019-covid-19-emergency-use-authorizations-medical-devices/vitro-diagnostics-euas#individual-serological)  
35 [devices/coronavirus-disease-2019-covid-19-emergency-use-authorizations-medical-devices/vitro-diagnostics-](https://www.fda.gov/medical-devices/coronavirus-disease-2019-covid-19-emergency-use-authorizations-medical-devices/vitro-diagnostics-euas#individual-serological)  
36 [euas#individual-serological](https://www.fda.gov/medical-devices/coronavirus-disease-2019-covid-19-emergency-use-authorizations-medical-devices/vitro-diagnostics-euas#individual-serological) (2020).
- 37 [2] K. L. Bajema, R. E. Wiegand, K. Cuffe, S. V. Patel, R. Iachan, T. Lim, A. Lee, D. Moyse, F. P. Havers, L. Harding, A. M.  
38 Fry, A. J. Hall, K. Martin, M. Biel, Y. Deng, W. A. Meyer, M. Mathur, T. Kyle, A. V. Gundlapalli, N. J. Thornburg, L. R.  
39 Petersen, and C. Edens, Estimated SARS-CoV-2 seroprevalence in the US as of September 2020, *JAMA Internal Medicine*  
40 **181**, 450 (2021).
- 41 [3] US Food & Drug Administration, EUA authorized serology test performance, [https://www.fda.gov/medical-](https://www.fda.gov/medical-devices/coronavirus-disease-2019-covid-19-emergency-use-authorizations-medical-devices/eua-authorized-serology-test-performance)  
42 [devices/coronavirus-disease-2019-covid-19-emergency-use-authorizations-medical-devices/eua-authorized-serology-test-](https://www.fda.gov/medical-devices/coronavirus-disease-2019-covid-19-emergency-use-authorizations-medical-devices/eua-authorized-serology-test-performance)  
43 [performance](https://www.fda.gov/medical-devices/coronavirus-disease-2019-covid-19-emergency-use-authorizations-medical-devices/eua-authorized-serology-test-performance) (2020).
